# Supplementary material
Source: PubMed Central journal article supplement (PMC4043937)
Supplement: NIHMS578315-supplement-01.pdf [file NIHMS578315-supplement-01.pdf]

# Neurotoxicology and Teratology

## Conflict of Interest Policy

Article Title: Effects of tobacco smoke on PC12 cell neurodifferentiation are distinct from those of nicotine or benzo[a]pyrene

Author name:  
Theodore Slotkin, Jennifer Card, Ashley Stadler, Edward Levin, Frederic Seidler

### Declarations

*Neurotoxicology and Teratology* requires that all authors sign a declaration of conflicting interests. If you have nothing to declare in any of these categories then this should be stated.

#### Conflict of Interest

A conflicting interest exists when professional judgement concerning a primary interest (such as patient's welfare or the validity of research) may be influenced by a secondary interest (such as financial gain or personal rivalry). It may arise for the authors when they have financial interest that may influence their interpretation of their results or those of others. Examples of potential conflicts of interest include employment, consultancies, stock ownership, honoraria, paid expert testimony, patent applications/registrations, and grants or other funding.

#### Please state any competing interests

TAS has received consultant income in the past three years from the following firms: The Calwell Practice (Charleston WV), Finnegan Henderson Farabow Garrett & Dunner (Washington DC), Carter Law (Peoria IL), Gutglass Erickson Bonville & Larson (Madison WI), The Killino Firm (Philadelphia PA), Alexander Hawes (San Jose, CA), Pardieck Law (Seymour, IN), Tummel & Casso (Edinburg, TX), Shanahan Law Group (Raleigh NC), and Chaperone Therapeutics (Research Triangle Park, NC).

#### Funding Source

All sources of funding should also be acknowledged and you should declare any involvement of study sponsors in the study design; collection, analysis and interpretation of data; the writing of the manuscript; the decision to submit the manuscript for publication. If the study sponsors had no such involvement, this should be stated.

#### Please state any sources of funding for your research

NIH ES022831 and EPA 83543701

**Signature** (a scanned signature is acceptable, but each author must sign)



**Print name**

Theodore Slotkin



Frederic Seidler

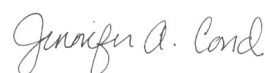

Jennifer Card

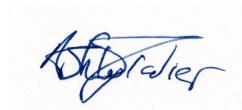

Ashley Stadler



Edward Levin
